# Supplementary material for: Royal jelly fatty acids bioprofiling using TLC-MS and digital image analysis coupled with chemometrics and non-parametric regression for discovering efficient biomarkers against melanoma
Source: Royal Society of Chemistry journal article supplement (doi:10.1039/d1ra00580d), 2021-01-01
Supplement: d1ra00580d1.pdf [file d1ra00580d1.pdf]

**Table S1: The sources and state of the eighteen royal jelly samples used in the study:**

| <b>Sample #</b> | <b>Code</b> | <b>Source*</b>                         | <b>State</b>           |
|-----------------|-------------|----------------------------------------|------------------------|
| 1               | RJ1         | Seif Pharmaceutical Company            | lyophilized            |
| 2               | RJ2         | Seif Pharmaceutical Company            | lyophilized            |
| 3               | RJ3         | Shana Apiary stores                    | lyophilized            |
| 4               | RJ4         | Shana Apiary stores                    | lyophilized            |
| 5               | RJ5         | Shana Apiary stores                    | Fresh                  |
| 6               | RJ6         | Shana Apiary stores                    | Fresh                  |
| 7               | RJ7         | Imtenan Apiary stores                  | lyophilized (imported) |
| 8               | RJ8         | Imtenan Apiary stores                  | lyophilized (imported) |
| 9               | RJ9         | Imtenan Apiary stores                  | Fresh (imported)       |
| 10              | RJ10        | Imtenan Apiary stores                  | Fresh (imported)       |
| 11              | RJ11        | Imtenan Apiary stores                  | Fresh (local)          |
| 12              | RJ12        | Imtenan Apiary stores                  | Fresh (local)          |
| 13              | RJ13        | Royal jelly 1000 capsules <sup>®</sup> | lyophilized            |
| 14              | RJ14        | Royal jelly 1000 capsules <sup>®</sup> | lyophilized            |
| 15              | RJ15        | El-Dakhakhny Apiary stores             | Fresh                  |
| 16              | RJ16        | El-Dakhakhny Apiary stores             | Fresh                  |
| 17              | RJ17        | El-Dakhakhny Apiary stores             | lyophilized            |
| 18              | RJ18        | El-Dakhakhny Apiary stores             | lyophilized            |

\*samples from two different batches were obtained from each source

**Table S2: Rf values and peak areas of the bands corresponding to the five quantified royal jelly fatty acids:**

|           | <b>(a) 8-hydroxyoctanoic acid</b> | <b>(b) 3,10-dihydroxydecanoic acid</b> | <b>(c) 10-hydroxy-2-decenoic acid (10-HDA)</b> | <b>(d) decanedioic acid</b> | <b>(e) 10-hydroxydecanoic acid</b> |
|-----------|-----------------------------------|----------------------------------------|------------------------------------------------|-----------------------------|------------------------------------|
|           | Rf= 0.41                          | Rf= 0.50                               | Rf= 0.58                                       | Rf=0.67                     | Rf= 0.73                           |
|           | Peak area $\pm$ SD*               | Peak area $\pm$ SD*                    | Peak area $\pm$ SD*                            | Peak area $\pm$ SD*         | Peak area $\pm$ SD*                |
| STD MIX-5 | 20930 $\pm$ 0.025                 | 31219 $\pm$ 0.154                      | 92752 $\pm$ 0.025                              | 1396.991 $\pm$ 0.251        | 24290 $\pm$ 0.231                  |
| RJ1       | 26648.52747 $\pm$ 0.064           | 46848.30503 $\pm$ 0.254                | 131090.4509 $\pm$ 0.214                        | 4550.595271 $\pm$ 0.251     | 59513.89782 $\pm$ 0.014            |
| RJ2       | 11065.27473 $\pm$ 0.134           | 21108.11231 $\pm$ 0.369                | 91108.39089 $\pm$ 0.325                        | 5123.277767 $\pm$ 0.036     | 20390.31301 $\pm$ 0.514            |
| RJ3       | 8927.164835 $\pm$ 0.052           | 8987.136349 $\pm$ 0.452                | 57711.84406 $\pm$ 0.412                        | 4254.94468 $\pm$ 0.145      | 9126.318156 $\pm$ 0.241            |
| RJ4       | 12319.51648 $\pm$ 0.112           | 12841.81678 $\pm$ 0.025                | 69021.78299 $\pm$ 0.652                        | 4259.552116 $\pm$ 0.025     | 10933.01832 $\pm$ 0.365            |
| RJ5       | 1895.384615 $\pm$ 0.0321          | 14037.06205 $\pm$ 0.369                | 43695.16854 $\pm$ 0.521                        | 2443.857745 $\pm$ 0.522     | 3870.2669 $\pm$ 0.415              |
| RJ6       | 10180.92308 $\pm$ 0.054           | 38096.06237 $\pm$ 0.145                | 81014.99983 $\pm$ 0.011                        | 3181.938304 $\pm$ 0.215     | 21725.01186 $\pm$ 0.021            |
| RJ7       | 3563.468058 $\pm$ 0.065           | 15041.18572 $\pm$ 0.254                | 63939.8046 $\pm$ 0.023                         | 2013.288247 $\pm$ 0.113     | 8604.798519 $\pm$ 0.054            |
| RJ8       | 5442.948174 $\pm$ 0.147           | 20925.03232 $\pm$ 0.354                | 79816.02001 $\pm$ 0.321                        | 2356.713585 $\pm$ 0.214     | 14872.32356 $\pm$ 0.085            |
| RJ9       | 1218.218001 $\pm$ 0.254           | 3999.930552 $\pm$ 0.587                | 25749.26175 $\pm$ 0.541                        | 1592.914901 $\pm$ 0.415     | 1047.447431 $\pm$ 0.412            |
| RJ10      | 1811.910673 $\pm$ 0.087           | 6912.572414 $\pm$ 0.652                | 33365.54351 $\pm$ 0.652                        | 2927.320698 $\pm$ 0.051     | 1722.389666 $\pm$ 0.325            |
| RJ11      | 1665.291544 $\pm$ 0.036           | 10696.76767 $\pm$ 0.025                | 47111.65355 $\pm$ 0.152                        | 1965.286406 $\pm$ 0.651     | 8256.602684 $\pm$ 0.014            |
| RJ12      | 1665.291544 $\pm$ 0.154           | 22458.00173 $\pm$ 0.361                | 72232.3988 $\pm$ 0.163                         | 1973.24316 $\pm$ 0.214      | 24809.847 $\pm$ 0.026              |
| RJ13      | 13285.60856 $\pm$ 0.325           | 60938.37968 $\pm$ 0.452                | 14260.52078 $\pm$ 0.251                        | 20872.41193 $\pm$ 0.321     | 33061.69125 $\pm$ 0.258            |
| RJ14      | 15433.65828 $\pm$ 0.214           | 65839.95909 $\pm$ 0.025                | 41537.78315 $\pm$ 0.351                        | 19072.80922 $\pm$ 0.025     | 45473.25343 $\pm$ 0.369            |
| RJ15      | 1940.324949 $\pm$ 0.584           | 18378.89735 $\pm$ 0.036                | 54424.9644 $\pm$ 0.423                         | 4769.561871 $\pm$ 0.036     | 4538.489907 $\pm$ 0.214            |
| RJ16      | 4781.180688 $\pm$ 0.047           | 24703.96024 $\pm$ 0.541                | 64429.24315 $\pm$ 0.142                        | 4405.803843 $\pm$ 0.218     | 6082.466376 $\pm$ 0.352            |
| RJ17      | 8616.77479 $\pm$ 0.036            | 8641.362976 $\pm$ 0.361                | 55849.38772 $\pm$ 0.025                        | 2506.579997 $\pm$ 0.425     | 5793.248882 $\pm$ 0.456            |
| RJ18      | 50243.64961 $\pm$ 0.025           | 41735.53088 $\pm$ 0.036                | 123573.1651 $\pm$ 0.542                        | 3707.496536 $\pm$ 0.231     | 44202.60338 $\pm$ 0.365            |

\*SD is standard deviation of two determinations.

**Table S3: Parametric and non-parametric evaluation of the repeatability (intra-day precision) and intermediate precision (inter-day precision) for the determination of royal jelly fatty acids by the developed HPTLC-image analysis method:**

|                                                              | Intra-day precision    |       |                             |       |                            |       |                  |       |                         |       | Inter-day precision    |       |                             |        |                            |       |                  |        |                         |        |
|--------------------------------------------------------------|------------------------|-------|-----------------------------|-------|----------------------------|-------|------------------|-------|-------------------------|-------|------------------------|-------|-----------------------------|--------|----------------------------|-------|------------------|--------|-------------------------|--------|
|                                                              | Recovery% <sup>a</sup> |       |                             |       |                            |       |                  |       |                         |       |                        |       |                             |        |                            |       |                  |        |                         |        |
|                                                              | 8-hydroxyoctanoic acid |       | 3,10-dihydroxydecanoic acid |       | 10-hydroxy-2-decenoic acid |       | decanedioic acid |       | 10-hydroxydecanoic acid |       | 8-hydroxyoctanoic acid |       | 3,10-dihydroxydecanoic acid |        | 10-hydroxy-2-decenoic acid |       | decanedioic acid |        | 10-hydroxydecanoic acid |        |
| Nominal fatty acid concentration ( $\mu\text{g spot}^{-1}$ ) | P                      | NP    | P                           | NP    | P                          | NP    | P                | NP    | P                       | NP    | P                      | NP    | P                           | NP     | P                          | NP    | P                | NP     | P                       | NP     |
| 10                                                           | 97.45                  | 99.45 | 96.96                       | 99.55 | 96.45                      | 99.45 | 98.15            | 99.85 | 97.48                   | 99.54 | 98.47                  | 99.78 | 96.48                       | 99.78  | 96.45                      | 99.45 | 98.45            | 99.65  | 97.45                   | 99.78  |
| 20                                                           | 96.15                  | 99.15 | 97.58                       | 99.13 | 97.48                      | 99.87 | 97.45            | 99.78 | 97.46                   | 99.71 | 97.45                  | 99.45 | 97.45                       | 100.13 | 96.87                      | 99.65 | 97.12            | 100.11 | 98.22                   | 99.98  |
| 30                                                           | 96.78                  | 99.78 | 98.45                       | 99.45 | 98.45                      | 99.31 | 97.65            | 99.66 | 98.45                   | 99.45 | 96.45                  | 99.34 | 97.47                       | 100.10 | 97.45                      | 99.32 | 96.98            | 100.05 | 97.99                   | 100.00 |
| Mean% <sup>b</sup>                                           | 96.79                  | 99.46 | 97.66                       | 99.38 | 97.46                      | 99.54 | 97.75            | 99.76 | 97.80                   | 99.57 | 97.46                  | 99.52 | 97.13                       | 100.00 | 96.92                      | 99.47 | 97.52            | 99.92  | 97.89                   | 99.92  |
| SD <sup>c</sup>                                              | 0.650                  | 0.315 | 0.749                       | 0.220 | 1.00                       | 0.291 | 0.361            | 0.096 | 0.566                   | 0.132 | 1.010                  | 0.229 | 0.566                       | 0.194  | 0.502                      | 0.166 | 0.811            | 0.240  | 0.395                   | 0.122  |
| RSD(%) <sup>d</sup>                                          | 0.672                  | 0.317 | 0.766                       | 0.221 | 1.026                      | 0.293 | 0.369            | 0.096 | 0.579                   | 0.133 | 1.036                  | 0.230 | 0.583                       | 0.194  | 0.518                      | 0.167 | 0.832            | 0.240  | 0.404                   | 0.122  |
| F-test <sup>e</sup>                                          | -                      | 4.49  | -                           | 12.05 | -                          | 12.29 | -                | 14.67 | -                       | 19.04 | -                      | 20.29 | -                           | 9.020  | -                          | 9.611 | -                | 11.98  | -                       | 10.99  |

a the mean recovery of three determinations at each concentration level of the fatty acid.

b the mean of all recoveries at different concentration levels of the fatty acid.

c standard deviation of the mean of recoveries at different concentration levels of the fatty acid.

d percentage relative standard deviation.

e F-test for comparison between two sample variances,  $F$  critical=4.433 ( $n_1=n_2=9$ ,  $P=0.05$ )
